# Supplementary material for: Can the current Mpox affect the heart? A Systematic Review of case series and case report
Source: Research Square preprint supplement (doi:10.21203/rs.3.rs-2670509/v1), 2023-03-21
Supplement: Supplementary file 1 [file 45b0ec893f5ebe5e1a24a04d.docx]

| Author (YOP) | Q1 | Q2 | Q3 | Q4 | Q5 | Q6 | Q7 | Q8 | Q9 | Overall rating |
| --- | --- | --- | --- | --- | --- | --- | --- | --- | --- | --- |
| Brouillard et al. 2022 | Y | Y | U | U | Y | Y | N | U | Y | FAIR |
| Dumont et al. 2022 | Y | Y | Y | Y | U | N | U | U | Y | FAIR |
| Pinho et al. 2022 | N | N | U | U | N | N | U | U | N | Poor |
| Rodriguez-Nava et al. 2022 | Y | Y | Y | Y | Y | Y | Y | U | Y | Good |
| Shaik et al. 2022 | Y | Y | U | U | Y | U | Y | U | Y | Fair |
| Tan et al. 2022 | Y | Y | U | U | Y | Y | Y | U | Y | Fair |
| Thornhill et al.2022 | Y | Y | Y | U | Y | Y | Y | Y | Y | Good |

Table 2: The quality of included studies using the NIH tool for case series.

YOP: Year of publication; Y: Yes: N: No; U: Unclear; NIH: national institute of health

Q1: Was the study question or objective clearly stated? Yes/No/Unclear

Q2: Was the study population clearly and fully described, including a case definition?

Q3: Were the cases consecutive?

Q4: Were the subjects comparable?

Q5: Was the intervention clearly described?

Q6: Were the outcome measures clearly defined, valid, reliable, and implemented consistently across all study participants?

Q7: Was the length of follow-up adequate?

Q8: Were the statistical methods well-described?

Q9: Were the results well-described?
